# Supplementary material for: Smoking history and breast cancer risk by pathological subtype: MCC-Spain study
Source: PubMed Central journal article supplement (PMC10688255; doi:10.18332/tid/174132), 2023-11-30
Supplement: TID-21-157-s1.pdf [file TID-21-157-s1.pdf]

**Supplementary Table S1** Association between cigarette smoking variables and breast cancer risk, overall and by menopausal status, additionally adjusted by diet-related variables. Multi case-control study (MCC-Spain), 1733 breast cancer cases + 1903 controls, 2008-2013, Spain.

| Smoking variables                                        | All Women<br>(N = 3636; Cases = 1733; Controls = 1903) |      |                 |           |                 |           | Premenopausal Women<br>(N = 1157; Cases = 610; Controls = 547) |     |                 |           |                 |           | Postmenopausal Women<br>(N = 2474; Cases = 1122; Controls = 1352) |     |                 |           |                 |           | P-int <sup>f</sup> |
|----------------------------------------------------------|--------------------------------------------------------|------|-----------------|-----------|-----------------|-----------|----------------------------------------------------------------|-----|-----------------|-----------|-----------------|-----------|-------------------------------------------------------------------|-----|-----------------|-----------|-----------------|-----------|--------------------|
|                                                          | Ca                                                     | Co   | OR <sup>b</sup> | 95% CI    | OR <sup>c</sup> | 95% CI    | Ca                                                             | Co  | OR <sup>b</sup> | 95% CI    | OR <sup>d</sup> | 95% CI    | Ca                                                                | Co  | OR <sup>b</sup> | 95% CI    | OR <sup>e</sup> | 95% CI    |                    |
| <b>Smoking status (1 year before the interview)</b>      |                                                        |      |                 |           |                 |           |                                                                |     |                 |           |                 |           |                                                                   |     |                 |           |                 |           |                    |
| Never smoker                                             | 972                                                    | 1142 | 1.00            |           | 1.00            |           | 242                                                            | 237 | 1.00            |           | 1.00            |           | 730                                                               | 904 | 1.00            |           | 1.00            |           |                    |
| Former smoker ≥10                                        | 170                                                    | 180  | 1.12            | 0.88-1.41 | 1.02            | 0.77-1.36 | 61                                                             | 53  | 1.16            | 0.76-1.77 | 1.46            | 0.87-2.46 | 109                                                               | 126 | 1.01            | 0.76-1.35 | 0.81            | 0.54-1.22 |                    |
| Former smoker <10                                        | 168                                                    | 189  | 0.90            | 0.71-1.15 | 0.85            | 0.63-1.16 | 83                                                             | 80  | 1.01            | 0.70-1.45 | 0.94            | 0.59-1.51 | 85                                                                | 109 | 0.78            | 0.57-1.07 | 0.70            | 0.42-1.14 |                    |
| Active smoker                                            | 413                                                    | 390  | 1.03            | 0.87-1.24 | 1.04            | 0.82-1.32 | 219                                                            | 175 | 1.19            | 0.91-1.57 | 1.29            | 0.88-1.88 | 193                                                               | 213 | 0.87            | 0.68-1.11 | 0.81            | 0.56-1.17 |                    |
| <i>p-trend</i>                                           |                                                        |      |                 | 0.892     |                 | 0.940     |                                                                |     |                 | 0.259     |                 | 0.294     |                                                                   |     |                 | 0.162     |                 | 0.162     | 0.214              |
| <b>Age at smoking initiation</b>                         |                                                        |      |                 |           |                 |           |                                                                |     |                 |           |                 |           |                                                                   |     |                 |           |                 |           |                    |
| Never smoker                                             | 972                                                    | 1142 | 1.00            |           | 1.00            |           | 242                                                            | 237 | 1.00            |           | 1.00            |           | 730                                                               | 904 | 1.00            |           | 1.00            |           |                    |
| ≥18                                                      | 367                                                    | 369  | 1.09            | 0.91-1.30 | 1.01            | 0.80-1.27 | 140                                                            | 101 | 1.33            | 0.97-1.83 | 1.49            | 0.98-2.26 | 227                                                               | 267 | 0.93            | 0.75-1.16 | 0.73            | 0.53-1.01 |                    |
| <18                                                      | 389                                                    | 389  | 0.97            | 0.81-1.17 | 0.98            | 0.77-1.24 | 227                                                            | 209 | 1.05            | 0.80-1.37 | 1.11            | 0.77-1.58 | 161                                                               | 178 | 0.85            | 0.65-1.11 | 0.92            | 0.62-1.38 |                    |
| <i>p-trend</i>                                           |                                                        |      |                 | 0.955     |                 | 0.886     |                                                                |     |                 | 0.686     |                 | 0.576     |                                                                   |     |                 | 0.219     |                 | 0.362     | 0.036              |
| <b>Duration of tobacco use (years)</b>                   |                                                        |      |                 |           |                 |           |                                                                |     |                 |           |                 |           |                                                                   |     |                 |           |                 |           |                    |
| Never smoker                                             | 972                                                    | 1142 | 1.00            |           | 1.00            |           | 242                                                            | 237 | 1.00            |           | 1.00            |           | 730                                                               | 904 | 1.00            |           | 1.00            |           |                    |
| ≤20                                                      | 247                                                    | 229  | 1.08            | 0.87-1.34 | 1.07            | 0.82-1.41 | 151                                                            | 130 | 1.17            | 0.87-1.59 | 1.39            | 0.93-2.08 | 96                                                                | 98  | 1.05            | 0.76-1.44 | 0.85            | 0.54-1.34 |                    |
| 20-30                                                    | 249                                                    | 228  | 1.07            | 0.86-1.32 | 1.02            | 0.78-1.34 | 150                                                            | 138 | 1.01            | 0.75-1.37 | 0.95            | 0.63-1.43 | 99                                                                | 89  | 1.09            | 0.78-1.51 | 1.01            | 0.62-1.62 |                    |
| >30                                                      | 251                                                    | 299  | 0.96            | 0.79-1.16 | 0.89            | 0.69-1.16 | 61                                                             | 40  | 1.45            | 0.91-2.30 | 1.60            | 0.89-2.87 | 189                                                               | 258 | 0.77            | 0.61-0.97 | 0.69            | 0.48-0.98 |                    |
| <i>p-trend</i>                                           |                                                        |      |                 | 0.863     |                 | 0.504     |                                                                |     |                 | 0.284     |                 | 0.353     |                                                                   |     |                 | 0.052     |                 | 0.058     | 0.012              |
| <b>Intensity (no. of cigarettes per day)</b>             |                                                        |      |                 |           |                 |           |                                                                |     |                 |           |                 |           |                                                                   |     |                 |           |                 |           |                    |
| Never smoker                                             | 972                                                    | 1142 | 1.00            |           | 1.00            |           | 242                                                            | 237 | 1.00            |           | 1.00            |           | 730                                                               | 904 | 1.00            |           | 1.00            |           |                    |
| <15                                                      | 356                                                    | 363  | 1.00            | 0.84-1.20 | 0.98            | 0.78-1.23 | 180                                                            | 153 | 1.13            | 0.85-1.51 | 1.26            | 0.87-1.82 | 175                                                               | 209 | 0.85            | 0.67-1.09 | 0.70            | 0.49-1.01 |                    |
| ≥15                                                      | 384                                                    | 371  | 1.09            | 0.91-1.30 | 1.04            | 0.82-1.31 | 180                                                            | 149 | 1.18            | 0.88-1.58 | 1.25            | 0.84-1.88 | 204                                                               | 220 | 0.97            | 0.77-1.23 | 0.90            | 0.63-1.30 |                    |
| <i>p-trend</i>                                           |                                                        |      |                 | 0.378     |                 | 0.815     |                                                                |     |                 | 0.244     |                 | 0.232     |                                                                   |     |                 | 0.655     |                 | 0.375     | 0.105              |
| <b>Cumulative exposure (pack-years)</b>                  |                                                        |      |                 |           |                 |           |                                                                |     |                 |           |                 |           |                                                                   |     |                 |           |                 |           |                    |
| Never smoker                                             | 972                                                    | 1142 | 1.00            |           | 1.00            |           | 242                                                            | 237 | 1.00            |           | 1.00            |           | 730                                                               | 904 | 1.00            |           | 1.00            |           |                    |
| <10                                                      | 254                                                    | 256  | 0.98            | 0.80-1.21 | 1.01            | 0.78-1.31 | 140                                                            | 127 | 1.08            | 0.79-1.47 | 1.35            | 0.91-1.99 | 113                                                               | 128 | 0.89            | 0.66-1.19 | 0.73            | 0.48-1.12 |                    |
| 10-25                                                    | 228                                                    | 240  | 0.97            | 0.78-1.20 | 0.86            | 0.66-1.14 | 133                                                            | 105 | 1.23            | 0.90-1.69 | 1.11            | 0.72-1.71 | 95                                                                | 134 | 0.74            | 0.55-1.00 | 0.61            | 0.39-0.96 |                    |
| >25                                                      | 247                                                    | 234  | 1.16            | 0.94-1.42 | 1.12            | 0.85-1.47 | 82                                                             | 68  | 1.15            | 0.78-1.68 | 1.23            | 0.73-2.07 | 165                                                               | 165 | 1.05            | 0.81-1.36 | 1.03            | 0.70-1.52 |                    |
| <i>p-trend</i>                                           |                                                        |      |                 | 0.297     |                 | 0.816     |                                                                |     |                 | 0.248     |                 | 0.427     |                                                                   |     |                 | 0.733     |                 | 0.548     | 0.131              |
| <b>Years smoking before first birth<sup>a</sup></b>      |                                                        |      |                 |           |                 |           |                                                                |     |                 |           |                 |           |                                                                   |     |                 |           |                 |           |                    |
| Never smoker                                             | 801                                                    | 939  | 1.00            |           | 1.00            |           | 177                                                            | 162 | 1.00            |           | 1.00            |           | 624                                                               | 776 | 1.00            |           | 1.00            |           |                    |
| <10                                                      | 255                                                    | 253  | 0.99            | 0.80-1.23 | 0.96            | 0.72-1.27 | 118                                                            | 87  | 1.18            | 0.82-1.70 | 1.22            | 0.73-2.03 | 137                                                               | 165 | 0.85            | 0.64-1.12 | 0.73            | 0.48-1.12 |                    |
| ≥10                                                      | 253                                                    | 260  | 0.97            | 0.78-1.21 | 0.97            | 0.73-1.30 | 148                                                            | 132 | 1.06            | 0.77-1.47 | 1.08            | 0.68-1.71 | 105                                                               | 127 | 0.87            | 0.63-1.19 | 0.97            | 0.60-1.56 |                    |
| <i>p-trend</i>                                           |                                                        |      |                 | 0.789     |                 | 0.805     |                                                                |     |                 | 0.686     |                 | 0.674     |                                                                   |     |                 | 0.267     |                 | 0.580     | 0.255              |
| <b>Cigarettes per day before first birth<sup>a</sup></b> |                                                        |      |                 |           |                 |           |                                                                |     |                 |           |                 |           |                                                                   |     |                 |           |                 |           |                    |
| Never smoker                                             | 801                                                    | 939  | 1.00            |           | 1.00            |           | 177                                                            | 162 | 1.00            |           | 1.00            |           | 624                                                               | 776 | 1.00            |           | 1.00            |           |                    |
| <15                                                      | 211                                                    | 226  | 0.92            | 0.73-1.16 | 0.93            | 0.70-1.25 | 117                                                            | 95  | 1.09            | 0.77-1.56 | 1.22            | 0.76-1.95 | 94                                                                | 130 | 0.77            | 0.56-1.05 | 0.68            | 0.43-1.07 |                    |
| ≥15                                                      | 206                                                    | 212  | 0.98            | 0.78-1.24 | 0.97            | 0.71-1.31 | 106                                                            | 88  | 1.15            | 0.80-1.66 | 1.05            | 0.62-1.78 | 100                                                               | 123 | 0.86            | 0.63-1.18 | 0.99            | 0.61-1.59 |                    |
| <i>p-trend</i>                                           |                                                        |      |                 | 0.775     |                 | 0.759     |                                                                |     |                 | 0.441     |                 | 0.759     |                                                                   |     |                 | 0.208     |                 | 0.604     | 0.199              |

[j] OR: odds ratio. Multivariable logistic regression analyses were used to test whether each tobacco variable was associated with breast cancer risk. The p-trend values were calculated by incorporating the categorised variable as a continuous variable in the multivariable models. The p-value of the interaction term between menopausal status and the corresponding variable was calculated using the likelihood ratio test. <sup>a</sup> Only parous women. <sup>b</sup> OR and 95% CI adjusted for age, study level and region. <sup>c</sup> OR and 95% CI adjusted for age, study level, region, BMI, age at first birth, number of children, previous biopsies, family history of breast cancer, menopausal status, alcohol use, dietary pattern, daily caloric intake and antioxidant activity. <sup>d</sup> OR and 95% CI adjusted for age, study level, region, age at first birth, number of children, previous biopsies, family history of breast cancer, hormonal contraceptive use, alcohol use, dietary pattern, daily caloric intake and antioxidant activity. <sup>e</sup> OR and 95% CI adjusted for age, study level, region, BMI, age at first birth, number of children, previous biopsies, family history of breast cancer, history of hormone replacement therapy, age at menopause, alcohol use, dietary pattern, daily caloric intake and antioxidant activity. <sup>f</sup> P-int.: P value of the interaction term.



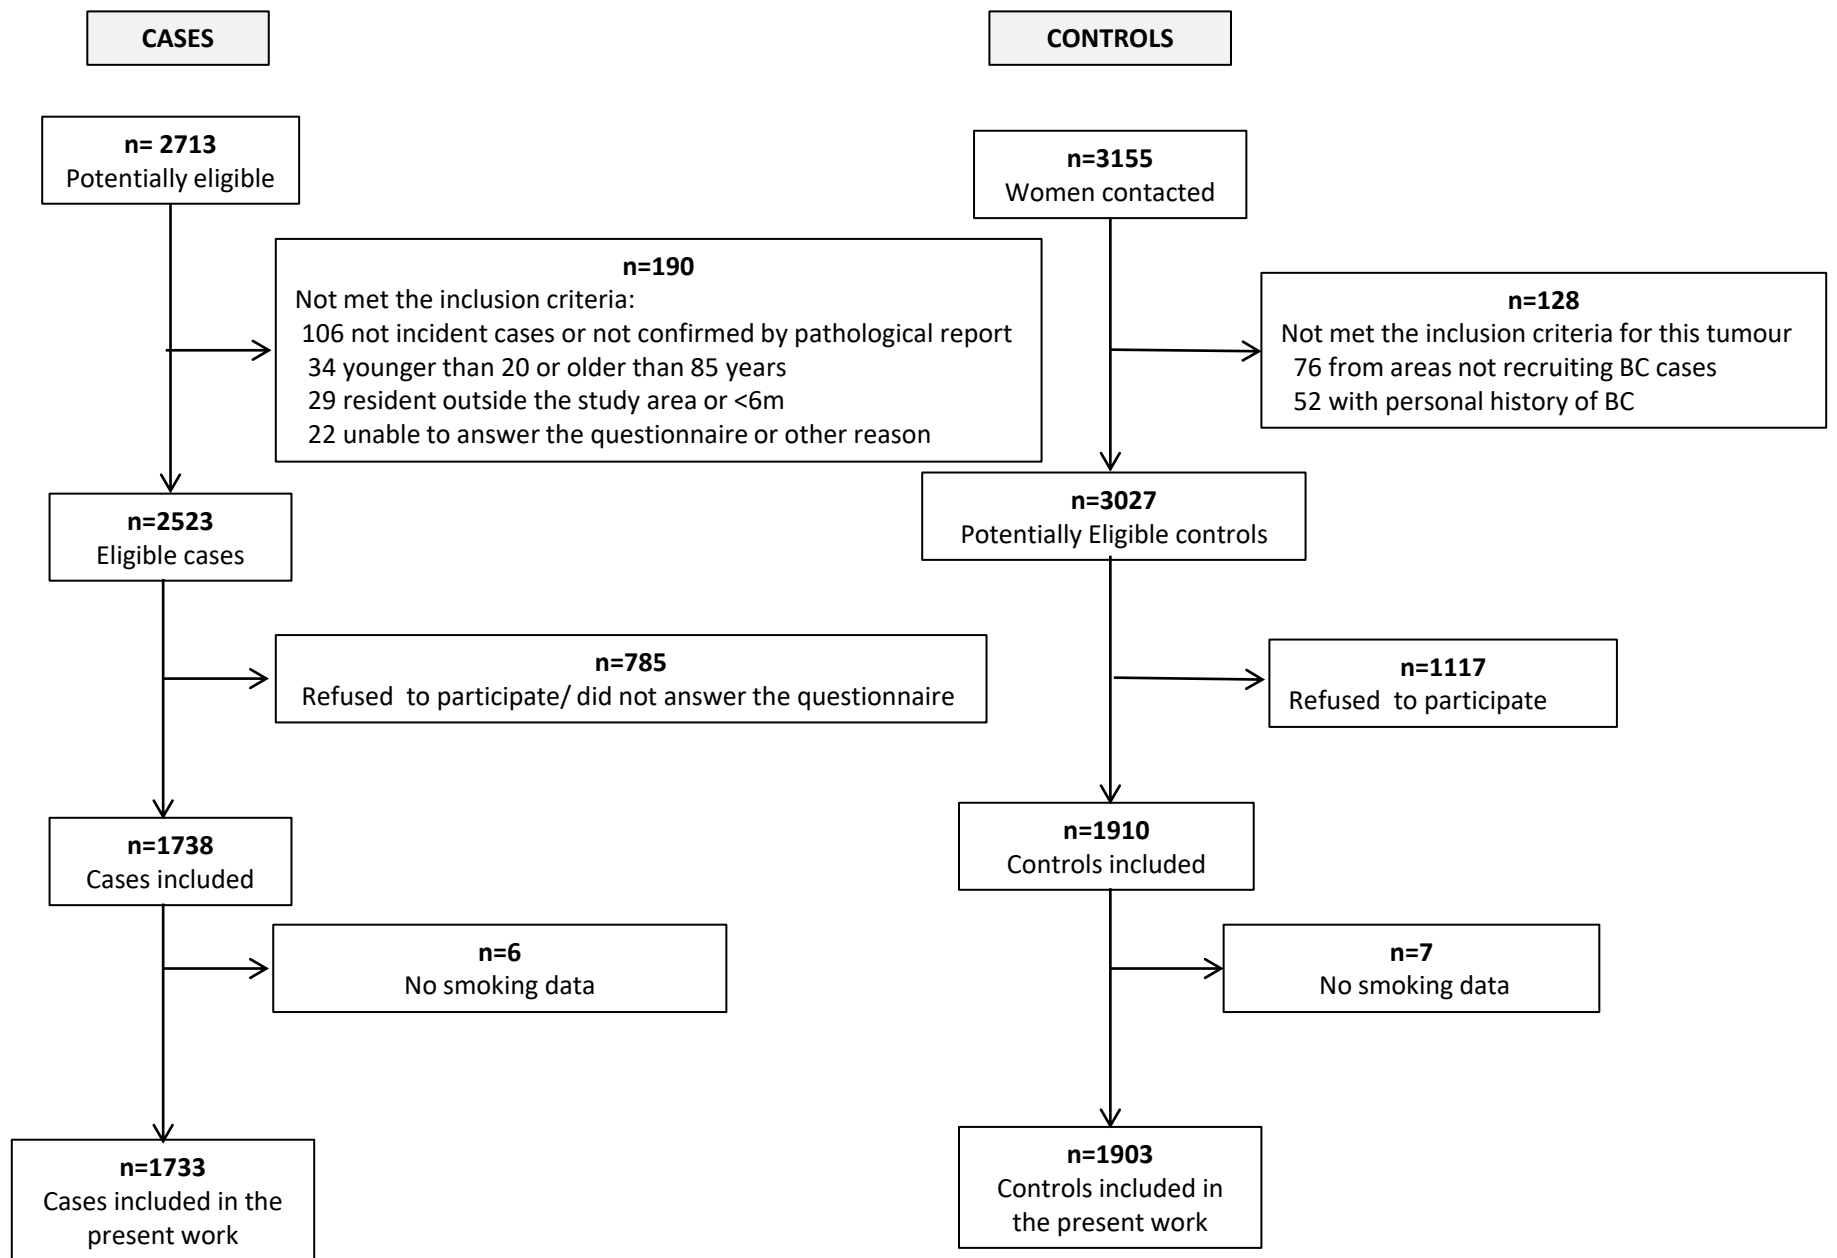

**Supplementary Fig. 1** Flowchart of response and selection of participants. Multi case-control study (MCC-Spain), 2008-2013, Spain.

© 2023 Peñalver-Argüeso B. et al.
